# Supplementary figures and images for: Thinking Styles and Emotional States of Male and Female Prison Inmates by Mental Disorder Status
Source: Atypon-hosted journal article supplement (doi:10.1176/appi.ps.000432011), 2011-12-01

# Study sample recruitment

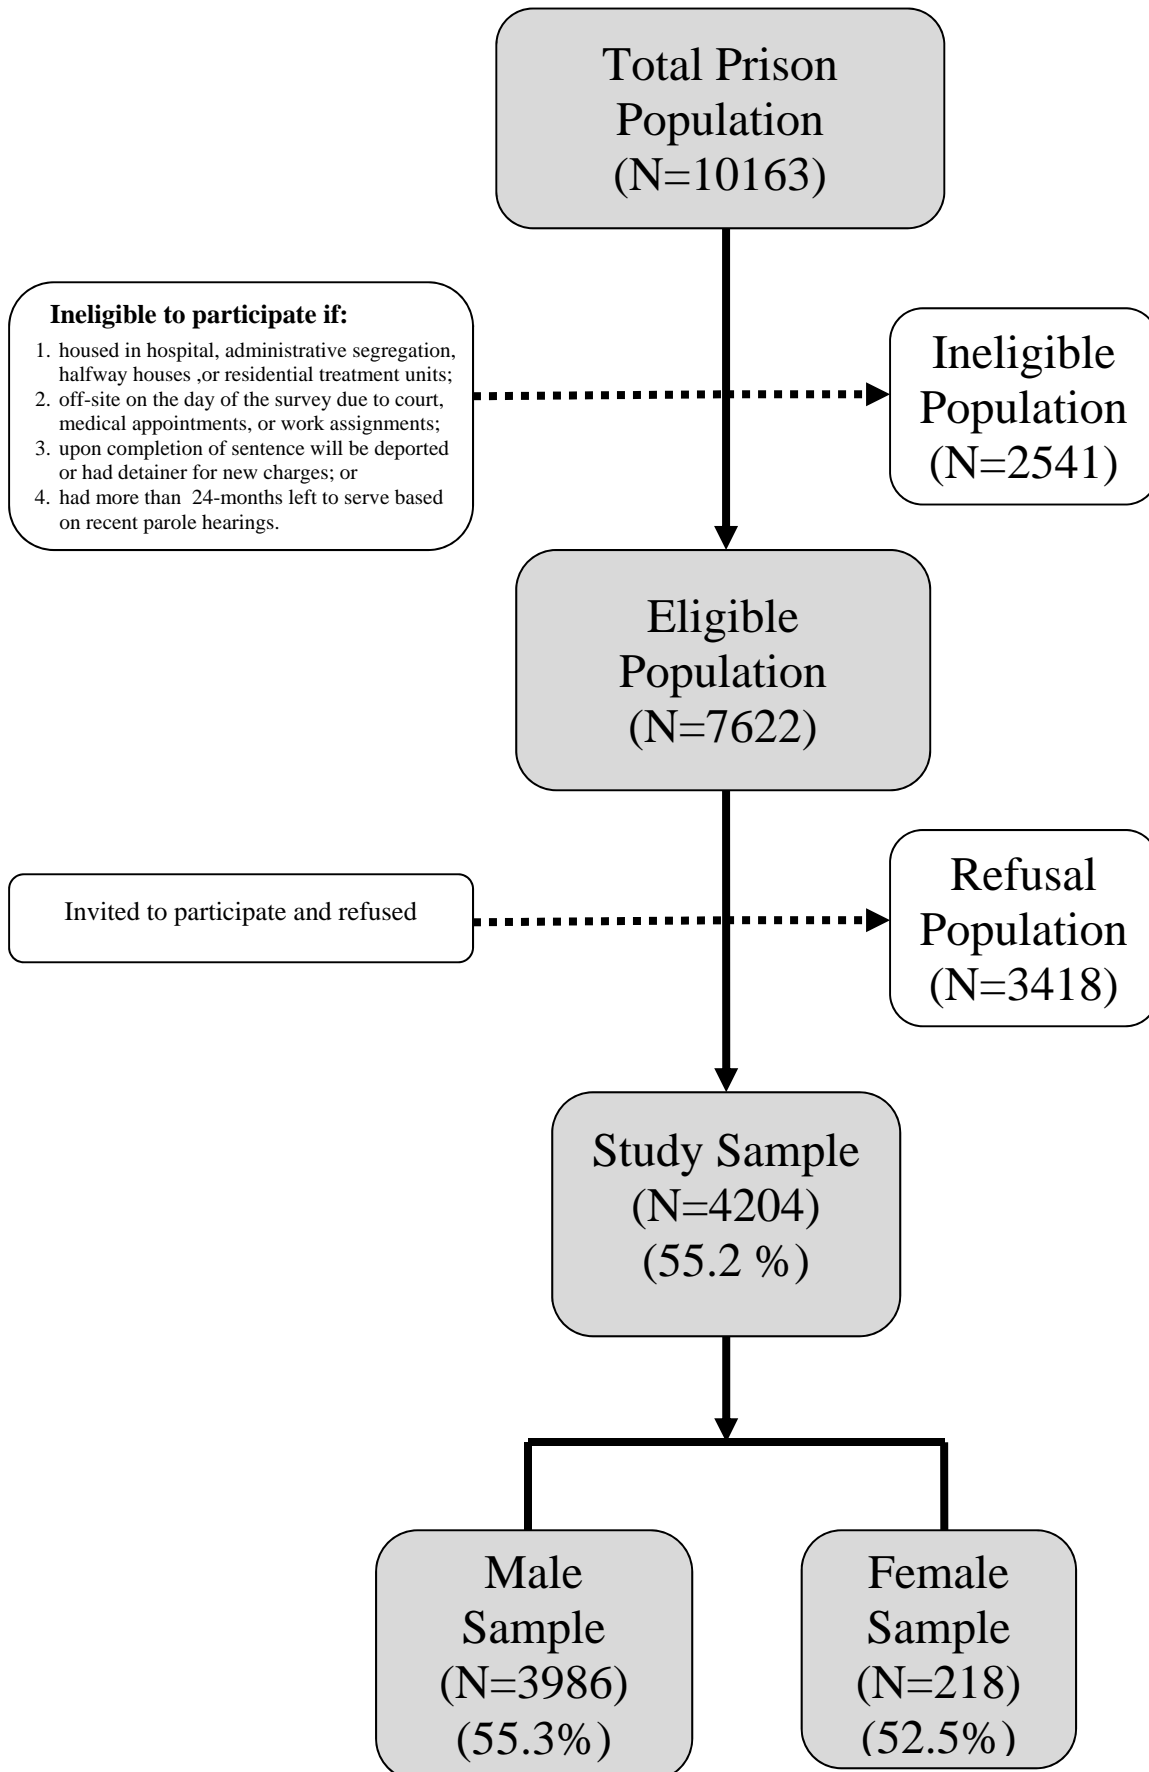

Supplement: pss6212_1485_ds.pdf [file pss6212_1485_ds.pdf]
